# Supplementary material for: Improved production of polysaccharides in Ganoderma lingzhi mycelia by plasma mutagenesis and rapid screening of mutated strains through infrared spectroscopy
Source: PubMed Central journal article supplement (PMC6150529; doi:10.1371/journal.pone.0204266), 2018-09-21
Supplement: pone.0204266.s003.pdf [file pone.0204266.s003.pdf]

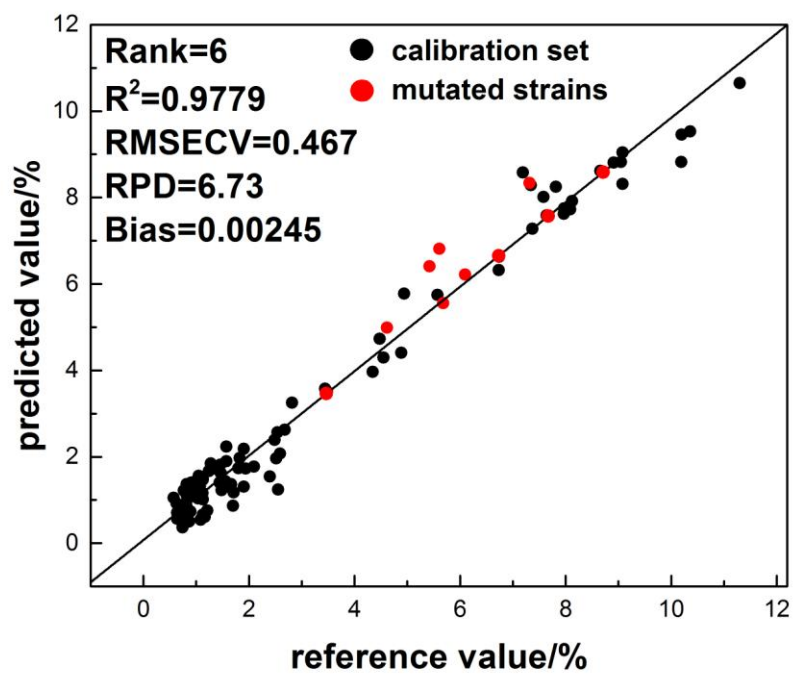

S3 Fig. NIR based quantitative model for *Ganoderma* calibration and mutated strains
