# Supplementary material for: Improved production of polysaccharides in Ganoderma lingzhi mycelia by plasma mutagenesis and rapid screening of mutated strains through infrared spectroscopy
Source: PubMed Central journal article supplement (PMC6150529; doi:10.1371/journal.pone.0204266), 2018-09-21
Supplement: pone.0204266.s004.pdf [file pone.0204266.s004.pdf]

**S1 Table** Assignments of the characteristic mid-IR bands in the mid-IR spectrum of mutated *G.**lingzhi* mycelium

| Wavenumber(c<br>m <sup>-1</sup> ) | Functional Group Assignments                      |
|-----------------------------------|---------------------------------------------------|
| 3400                              | -OH stretching                                    |
| 2925                              | CH <sub>2</sub> asymmetric stretching             |
| 1644                              | Amide I                                           |
| 1450                              | CH <sub>2</sub> in polysaccharides                |
| 1550                              | Amide II                                          |
| 1425                              | C-H deformation in lignin and carbohydrates       |
| 1370                              | C-H in-plane bending vibration                    |
| 1245                              | COH in-plane bending/CH in-plane bending          |
| 1153                              | C-O-C asymmetric stretching of glycosidic linkage |
| 1078                              | C-O stretching of β-glucans                       |
| 1044                              | stretching vibration of C-O-C group               |
| 1025                              | stretching vibration of C-O α-glycosidic bond     |
| 890                               | CH out-plane bending                              |
