# Supplementary material for: Improved production of polysaccharides in Ganoderma lingzhi mycelia by plasma mutagenesis and rapid screening of mutated strains through infrared spectroscopy
Source: PubMed Central journal article supplement (PMC6150529; doi:10.1371/journal.pone.0204266), 2018-09-21
Supplement: pone.0204266.s005.pdf [file pone.0204266.s005.pdf]

**S2 Table** The predicted polysaccharides contents of *G. lingzhi* mutant

| Mutated stains | Polysaccharides contents predicted value/% |
|----------------|--------------------------------------------|
| RWY-0          | 8.341 ±0.17                                |
| RWY-1          | 9.441 ±0.281*                              |
| RWY-2          | 7.796 ±0.277*                              |
| RWY-3          | 7.392 ±0.052                               |
| RWY-4          | 7.166 ±0.111                               |
| RWY-5          | 7.024 ±0.037                               |
| RWY-6          | 8.754 ±0.083                               |
| RWY-7          | 6.554 ±0.268*                              |
| RWY-8          | 4.791 ±0.333*                              |
| RWY-9          | 6.858 ±0.01                                |
| RWY-10         | 5.49 ±0.273*                               |
