# Supplementary material for: Improved production of polysaccharides in Ganoderma lingzhi mycelia by plasma mutagenesis and rapid screening of mutated strains through infrared spectroscopy
Source: PubMed Central journal article supplement (PMC6150529; doi:10.1371/journal.pone.0204266), 2018-09-21
Supplement: pone.0204266.s006.pdf [file pone.0204266.s006.pdf]

**S3 Table** Measurement of polysaccharide content of mutated *G. lingzhi* strains based on the

anthrone-sulfuric acid method

| Strain          | polysaccharide content (%) |
|-----------------|----------------------------|
| original strain | 6.191±0.091                |
| RWY-1           | 7.777±0.555                |
| RWY-2           | 6.965±0.102                |
| RWY-3           | 6.263±1.197                |
| RWY-4           | 5.951±0.346                |
| RWY-5           | 5.872±0.532                |
| RWY-6           | 6.311±0.305                |
| RWY-7           | 5.336±0.178                |
| RWY-8           | 3.865±0.556                |
| RWY-9           | 5.629±1.338                |
| RWY-10          | 4.959±0.550                |
